# Supplementary material
Source: PubMed Central journal article supplement (PMC4073228)

## Supplementary Data

### Selective targeting of activating and inhibitory Smads by distinct WWP2 ubiquitin ligase isoforms differentially modulates TGF $\beta$ signalling and EMT

Surinder M. Soond & Andrew Chantry

School of Biological Sciences, University of East Anglia, Norwich NR4 7TJ, UK

#### Quantifications using RT-PCR

The following forward (F) and reverse (R) primer pairs were used to quantify WWP2-isoform and human EMT marker transcripts using RT-PCR at an annealing temperature of 59°C and 58°C, respectively.

| Target          | Primer Sequences                                            | Product (bp) |
|-----------------|-------------------------------------------------------------|--------------|
| WWP2-FL (human) | TGAATGATGAACCCACAACAG (F)<br>CTGGTAGAGGAATCTTTGGCTGA (R)    | 476          |
| WWP2-FL (mouse) | TGAATGAGGAACCTACTCCAG (F)<br>CTGGTAGAGGAATCTTTGGCTGA (R)    | 476          |
| WWP2-N (human)  | TGAATGATGAACCCACAACAG (F)<br>CAGAGTCTCAGGTCTTCTCAGTTG (R)   | 334          |
| WWP2-N (mouse)  | TGAATGAGGAACCTACTCCAG (F)<br>CCATTCTAGAGTCTCAAGTC (R)       | 327          |
| WWP2-C (human)  | GTGTGGTTCTTGGAGAAAG (F)<br>GGGCGAGGATCCTTAAAGGT (R)         | 682          |
| WWP2-C (mouse)  | GTGTGGTTCTTGGAGAAAG (F)<br>GGGCAAGGATCCTTAAAGGT (R)         | 684          |
| Vimentin        | TGGCACGTCTTGACCTTGAA (F)<br>GGTCATCGTGATGCTGAGAA (R)        | 749          |
| Fibronectin     | CCGTGGGCAACTCTGTC (F)<br>TGCGGCAGTTGTCACAG (R)              | 427          |
| Snail           | AATCGGAAGCCTAACTACAGCGAG (F)<br>CCTTCCCCTGTCTCATCTGACA (R)  | 240          |
| p21             | CAGCAGAGGAAGACCATGTG (F)<br>GGCGTTTGGAGTGGTAGAAA (R)        | 439          |
| GAPDH           | TGTGAACCATGAGAAGTATGACAACAG (F)<br>ACACGGAAGGCCATGCCAGT (R) | 303          |

#### PCR primers for generating WWP2-isoform mammalian expression plasmids

The following primer pairs were used to PCR WWP2 coding sequences using pHM6-WWP2-HA expression plasmid (a gift from Fiona McDonald, University of Otago, NZ) as a template. PCR products were cloned downstream of the FLAG epitope-tag in plasmid pRK5 as *EcoRI/XhoI* restriction fragments:

##### WWP2-FL;

GATATCCCGAATTCATATGGCATCTGCCAGCTCTAGCCGGGGG (F)  
CTCGAGTTACTCCTGTCCAAAGCCCTCGG (R)

##### WWP2-N:

GATATCCCGAATTCATATGGCATCTGCCAGCTCTAGCCGGGGG (F)  
Primer 2, CTCGAGCTACCCTGGAGGAAGGGGCCGC (R)

**WWP2-C;**

GATATCCCGAATTCATATCCAGGAACCAGCTCTGCCCCGG (F)

Primer 2, CTCGAGTTACTCCTGTCCAAAGCCCTCGG (R)

**PCR primers for generating bacterial WWP2-isoform expression plasmids**

The following WWP2-isoforms were PCR cloned into pET28A as *NdeI/HindIII* digested restriction fragments:

**WWP2-FL;**

CTCGAGCATATGCTGCCTTTTGAGAAGTCTCAGCTC (F)

Primer 2, AAGCTTTTACTCGGTCTCCTCAATGGC (R)

**WWP2-N;**

CTCGAGCATATGCTGCCTTTTGAGAAGTCTCAGCTC (F)

AAGCTTTTAGCCTGGAGGAAGGGGCCG (R)

**WWP2-C;**

CTCGAGCATATGCGCAGTTTTTCGGTGGAAGTATCAC (F)

AAGCTTTTACTCGGTCTCCTCAATGGC (R)

**PCR primers for generating mammalian and bacterial WW-domain expression plasmids**

Mammalian expression plasmids corresponding to Flag epitope-tagged WW domains of WWP2 (in pRK5) were PCR cloned (via PCR Blunt; Invitrogen) as restriction fragments digested with *XhoI/HindIII*:

**WW1;**

GAATTCCATATGGACGCTCTGCCTGCTGGATGG (F)

AAGCTTGTCGACTTAAGGAAGGGGCCGCTCCCAGGT (R)

**WW2;**

GAATTCCATATGCGGCCCTTCCTCCAGGCTGG (F)

AAGCTTGTCGACTTACGCGGTTCGGACGCTGCCAGGT (R)

**WW3;**

GAATTCCATATGGGCCCCCTCCCTCCTGGCTGG (F)

AAGCTTGTCGACTTAGGTCCGGGGATCCTCCCCTG (R)

**WW4;**

GAATTCCATATGCCAGCTCTGCCCCCAGGATGG (F)

AAGCTTGTCGACTTACGGGCGAGGATCCTTAAAGGT (R)

**Extended-WW4;**

GAATTCCATATGATGATCCAGGAACCAGCTCTGCCCCC (F)

AAGCTTGTCGACTTACACGTGGCTAGGTAGGGCATTGA (R)

**PCR primers for generating WWP2 ligase-null mutants (Stratagene QuikChange mutagenesis kit)**

CCCAGAAGCCACACCGCCTTCAACCGTCTGGA (F)

TCCAGACGGTTGAAGGCGGTGTGGCTTCTGGG (R)

**PCR primers for generating shRNA-pTER plasmids specific for WWP2-FL**GATCTCCGGAGTACGTGCGCAACTATGATCAAGAGTCATAGTTGCGCACGTACTCCTTT  
TTA (sense)GATCTAAAAAGGAGTACGTGCGCAACTATGACTCTTGATCATAGTTGCGCACGTACTC  
CGGA (antisense)

## Supplementary Figure Legends

### Supplementary Figure S1: WWP2 binds to the PY motif in Smad7

(A) HEK293 cells expressing tagged-WWP2-FL were lysed and whole cell lysates (WCL) incubated with approximately 1 $\mu$ g of the indicated GST-Smad7 derived fusion proteins in a GST pull down assay (as described in Wicks *et al*, 2005). Protein complexes were washed and analysed using an anti-Flag antibody and Western blot analysis. (B) GST pulldowns were carried out as described above using the isolated GST-WW4 domain (extended version) and HEK-293 lysates from cells expressing Smad7-Flag.

### Supplementary Figure S2: WWP2 mediates Smad2 and Smad3 polyubiquitination

HEK293 cells were transfected with tagged-Smad2 (left panel) or Smad3 (right panel) 100ng HA-Ubiquitin and 100ng WWP2-FL as indicated. Cells were pre-treated with MG132 for 5hrs and then stimulated with TGF $\beta$  for 16hrs, followed by anti-HA immunoprecipitation and analysis of ubiquitination species by anti-Smad Western blot analysis.

### Supplementary Figure S3: WWP2N promotes WWP2-FL-dependent Smad2/3 turnover

Cos1 cells co-transfected with 1 $\mu$ g Smad2 (A) or Smad3 (B), with or without WWP-FL and WWP2-N plasmids, were pre-treated with MG132 for 18 hrs. Cells washed in fresh growth medium and incubated in the absence of MG132 and in the presence of cycloheximide for 2hrs, and TGF $\beta$  stimulated for the time points indicated. Whole cell lysates were assessed for Smad expression levels (middle),  $\beta$ -actin expression (left panel) and WWP2-FL/WWP2-N isoform expression using anti-Flag Western blotting (right panel). Smad-specific Western blots for Smad2 (C) and Smad3 (D) were quantified by densitometric scanning, and values were standardized for  $\beta$ -actin expression. Values were then standardized for WWP expression and Time=0 hr (which was set to 1), and graphs were plotted using Excel and optimum best-fit trendlines determined.

### Supplementary Figure S4: WWP2-N promotes Smad ubiquitination by endogenous WWP2

HEK293 cells were transfected with tagged-Smads, 100ng HA-Ubiquitin and 100ng WWP2-FL or 100ng WWP2-N as indicated. Cells were pre-treated with MG132 for 5hrs and then stimulated with TGF $\beta$  for 3hrs, followed by anti-HA immunoprecipitation and analysis of ubiquitination species by anti-Smad Western blot analysis.

### Supplementary Figure S5: WWP2-N promotes WWP2-FL turnover

(A) Cos1 cells co-transfected with 1 $\mu$ g WWP2-FL (with or without WWP2-N) plasmids, were pre-treated with MG132 for 18hrs. Cells washed in fresh growth medium and incubated in the absence of MG132 and in the presence of cycloheximide for 2hrs, and TGF $\beta$  stimulated for the time points indicated. Whole cell lysates were assessed for WWP2-FL expression levels (middle),  $\beta$ -actin expression (left panel) and WWP2-N isoform expression (right panel). (B) Western blots were quantified by densitometric scanning and values were standardized for  $\beta$ -actin expression. Values were then standardized for WWP expression and Time=0 hr (which was set to 1), and graphs were plotted using Excel and optimum best-fit trendlines determined.

### Supplementary Figure S6: Induction of classical EMT markers by TGF $\beta$ in Colo-357 cells

RNA isolated from Colo-357 cells stimulated with TGF $\beta$  for the indicated number of days, was isolated and reverse transcribed. 1.25ng cDNA were utilised as template DNA in RT-PCR using primers specific for vimentin, Snail, fibronectin, p21, fibronectin and GAPDH. Equal volumes of the PCR products were analysed by agarose gel electrophoresis.

**A**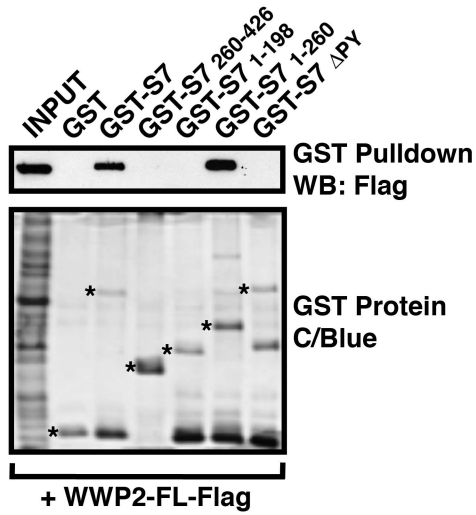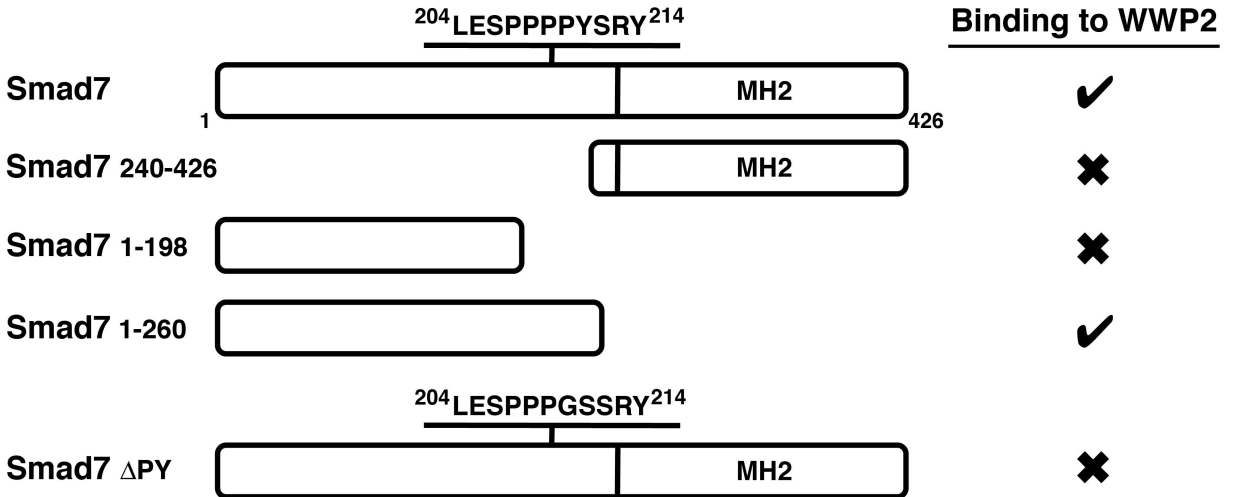**B**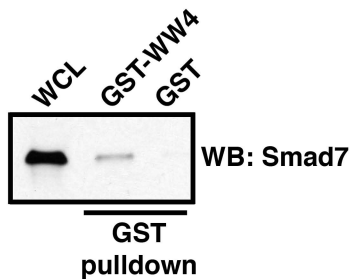

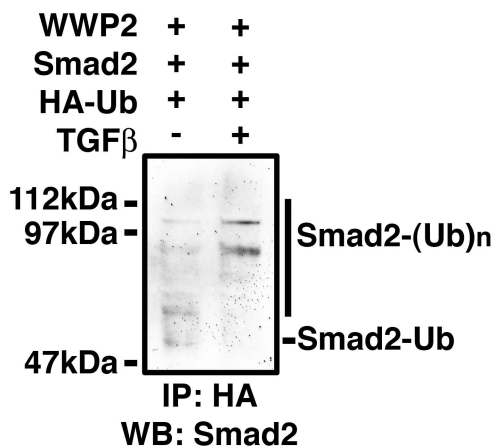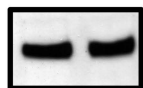

WCL  
WB: Smad2

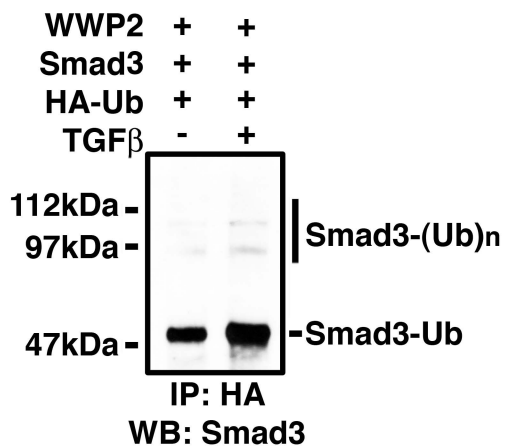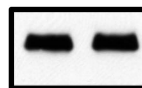

WCL  
WB: Smad3

**A**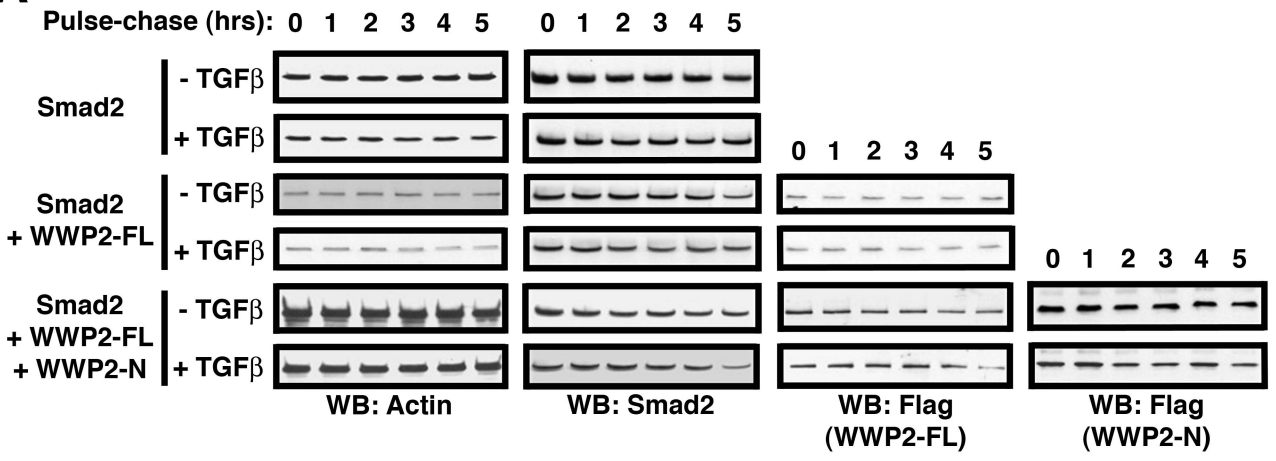**B**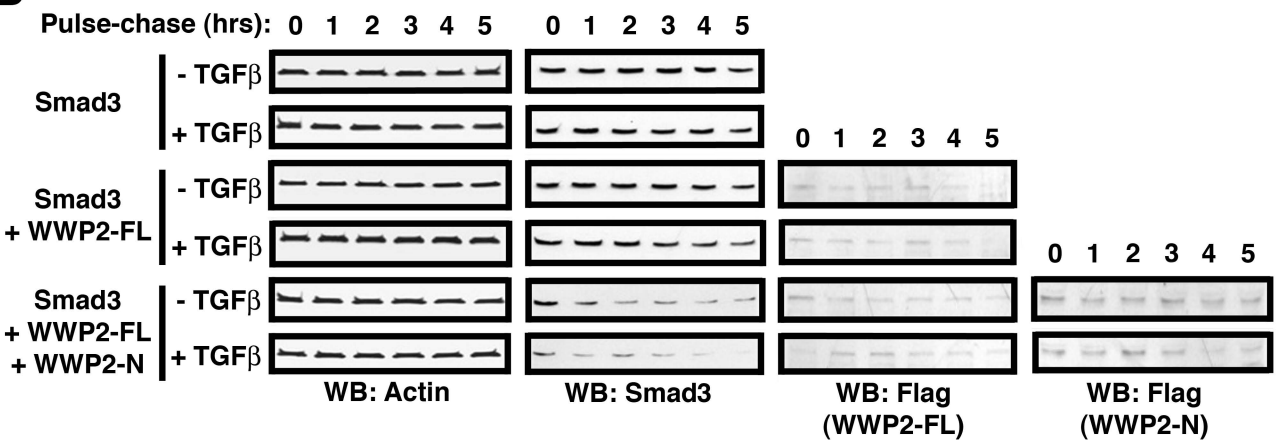**C**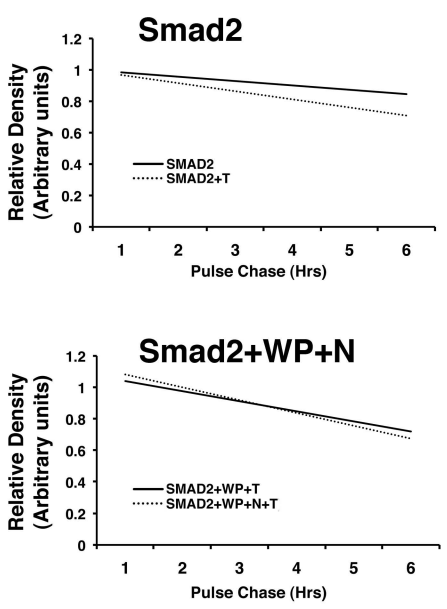**D**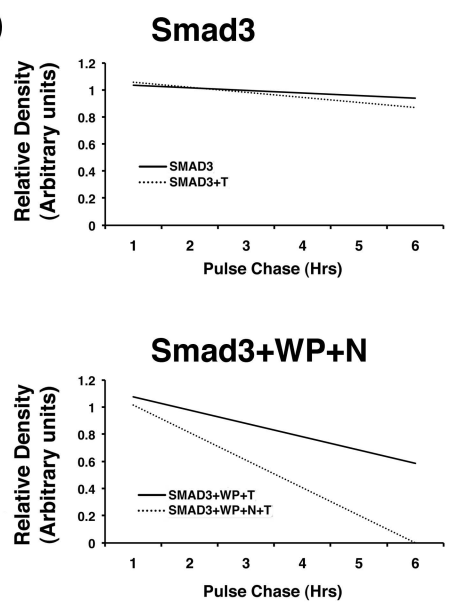

Supplementary Figure S3

|                |          |          |          |          |
|----------------|----------|----------|----------|----------|
| <b>Smad2</b>   | <b>+</b> | <b>+</b> | <b>+</b> | <b>+</b> |
| <b>WWP2-FL</b> | <b>-</b> | <b>+</b> | <b>+</b> | <b>-</b> |
| <b>WWP2-N</b>  | <b>-</b> | <b>-</b> | <b>+</b> | <b>+</b> |
| <b>TGFβ</b>    | <b>+</b> | <b>+</b> | <b>+</b> | <b>+</b> |

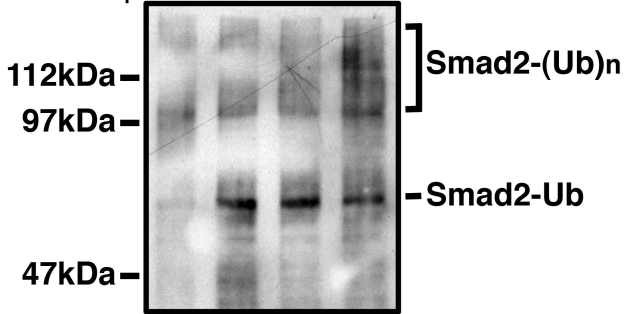

**IP: HA**  
**WB: Smad2**

|                |          |          |          |          |
|----------------|----------|----------|----------|----------|
| <b>Smad3</b>   | <b>+</b> | <b>+</b> | <b>+</b> | <b>+</b> |
| <b>WWP2-FL</b> | <b>-</b> | <b>+</b> | <b>+</b> | <b>-</b> |
| <b>WWP2-N</b>  | <b>-</b> | <b>-</b> | <b>+</b> | <b>+</b> |
| <b>TGFβ</b>    | <b>+</b> | <b>+</b> | <b>+</b> | <b>+</b> |

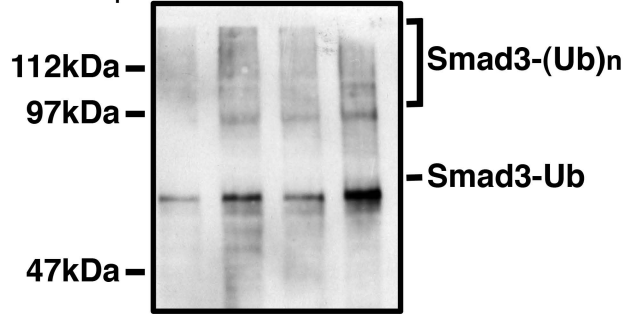

**IP: HA**  
**WB: Smad3**

**A**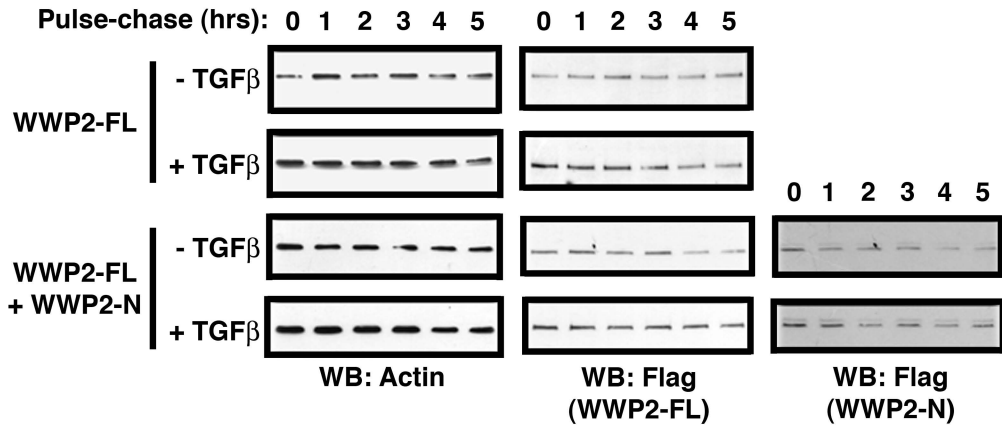**B**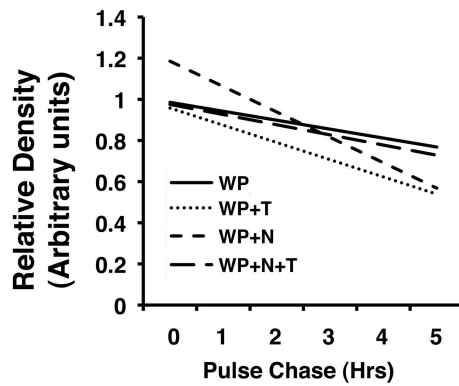



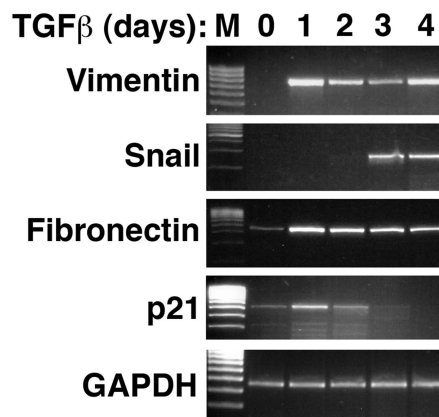

Supplement: NIHMS59347-supplement-Methods_and_data_figures.pdf [file NIHMS59347-supplement-Methods_and_data_figures.pdf]
